# Supplementary material
Source: PubMed Central journal article supplement (PMC6201272)
Supplement: NIHMS987512-supplement-SI.pdf [file NIHMS987512-supplement-SI.pdf]

## Supporting Information

### Polybrominated diphenyl ethers: structure determination and trends in antibacterial activity

Hongbing Liu,<sup>†</sup> Katheryn Lohith,<sup>†</sup> Margaret Rosario,<sup>†</sup> Thomas Pulliam,<sup>†</sup> Robert D. O'Connor,<sup>†</sup> Lori J. Bell<sup>‡</sup> and Carole A. Bewley<sup>†\*</sup>

<sup>†</sup>Laboratory of Bioorganic Chemistry, National Institute of Diabetes and Digestive and Kidney Diseases, National Institutes of Health, Bethesda, Maryland 20892-0820, USA

<sup>‡</sup>Coral Reef Research Foundation, Koror, PW 96940, Palau

Contents:

**Table S1.** <sup>1</sup>H and <sup>13</sup>C NMR data of **3a** and **5a** in CDCl<sub>3</sub> at 298 K

**Figure S1.** <sup>1</sup>H NMR spectrum of **8** in CDCl<sub>3</sub>

**Figure S2.** <sup>13</sup>C NMR spectrum of **8** in CDCl<sub>3</sub>

**Figure S3.** HSQC spectrum of **8** in CDCl<sub>3</sub>

**Figure S4.** HMBC spectrum of **8** in CDCl<sub>3</sub>

**Figure S5.** IR spectrum of **8**

**Figure S6.** HRESIMS spectrum of **8**

**Figure S7.** IR spectrum of **8**

**Figure S8.** Positive HRESIMS spectrum of **8**

**Figure S9.** <sup>1</sup>H NMR spectrum of **8a** in CDCl<sub>3</sub>

**Figure S10.** <sup>13</sup>C NMR spectrum of **8a** in CDCl<sub>3</sub>

**Figure S11.** HSQC spectrum of **8a** in CDCl<sub>3</sub>

**Figure S12.** HMBC spectrum of **8a** in CDCl<sub>3</sub>

**Figure S13.** 1D-DPGSE-NOE spectra of **8** and **8a** in CDCl<sub>3</sub>

**Figure S14.** IR spectrum of **8a**

**Figure S15.** HRESIMS spectrum of **8a**

**Figure S16.** <sup>1</sup>H NMR spectrum of **3a** in CDCl<sub>3</sub>

**Figure S17.** <sup>13</sup>C NMR spectrum of **3a** in CDCl<sub>3</sub>

**Figure S18.** HSQC spectrum of **3a** in CDCl<sub>3</sub>

**Figure S19.** HMBC spectrum of **3a** in CDCl<sub>3</sub>

**Figure S20.** IR spectrum of **3a**

**Figure S21.** HRESIMS spectrum of **3a**

**Figure S22.** <sup>1</sup>H NMR spectrum of **5a** in CDCl<sub>3</sub>

**Figure S23.** <sup>13</sup>C NMR spectrum of **5a** in CDCl<sub>3</sub>

**Figure S24.** HSQC spectrum of **5a** in CDCl<sub>3</sub>

---

\* Corresponding author: Tel: +1-(301)-594-5187. E-mail: caroleb@mail.nih.gov

**Figure S25.** HMBC spectrum of **5a** in CDCl<sub>3</sub>

**Figure S26.** IR spectrum of **5a**

**Figure S27.** HRESIMS spectrum of **5a**

**Experimental for MIC and cytotoxicity determination.**

**Table S1.**  $^1\text{H}$  and  $^{13}\text{C}$  NMR data of **3a** and **5a** in  $\text{CDCl}_3$  at 298 K

| No.                 | <b>3a</b>                           |                           | <b>5a</b>                           |                           |
|---------------------|-------------------------------------|---------------------------|-------------------------------------|---------------------------|
|                     | $\bar{\delta}_{\text{H}}$ (J in Hz) | $\bar{\delta}_{\text{C}}$ | $\bar{\delta}_{\text{H}}$ (J in Hz) | $\bar{\delta}_{\text{C}}$ |
| 1                   |                                     | 150.9, C                  |                                     | 150.1, C                  |
| 2                   |                                     | 145.7, C                  |                                     | 147.9, C                  |
| 3                   |                                     | 119.3, C                  |                                     | 119.5, C                  |
| 4                   | 7.40 d (2.2)                        | 129.7, CH                 | 7.53 d (2.1)                        | 131.6, CH                 |
| 5                   |                                     | 116.8, C                  |                                     | 117.0, C                  |
| 6                   | 6.48 d (2.2)                        | 117.1, CH                 | 6.96 d (2.1)                        | 122.3, CH                 |
| 1'                  |                                     | 150.5, C                  |                                     | 148.8, C                  |
| 2'                  |                                     | 146.5, C                  |                                     | 149.1, C                  |
| 3'                  |                                     | 120.8, C                  | 7.15 s                              | 122.9, CH                 |
| 4'                  |                                     | 120.9, C                  |                                     | 120.1, C                  |
| 5'                  | 7.82 s                              | 133.9, CH                 |                                     | 123.4, C                  |
| 6'                  |                                     | 117.9, C                  |                                     | 120.1, C                  |
| 2-OCH <sub>3</sub>  | 3.81 s, 3H                          | 61.7, CH <sub>3</sub>     | 3.89 s, 3H                          | 61.4, CH <sub>3</sub>     |
| 1'-OCH <sub>3</sub> | 4.00 s, 3H                          | 61.4, CH <sub>3</sub>     | 3.87 s, 3H                          | 61.4, CH <sub>3</sub>     |

**Figure S1.**  $^1\text{H}$  NMR spectrum of **8** in  $\text{CDCl}_3$

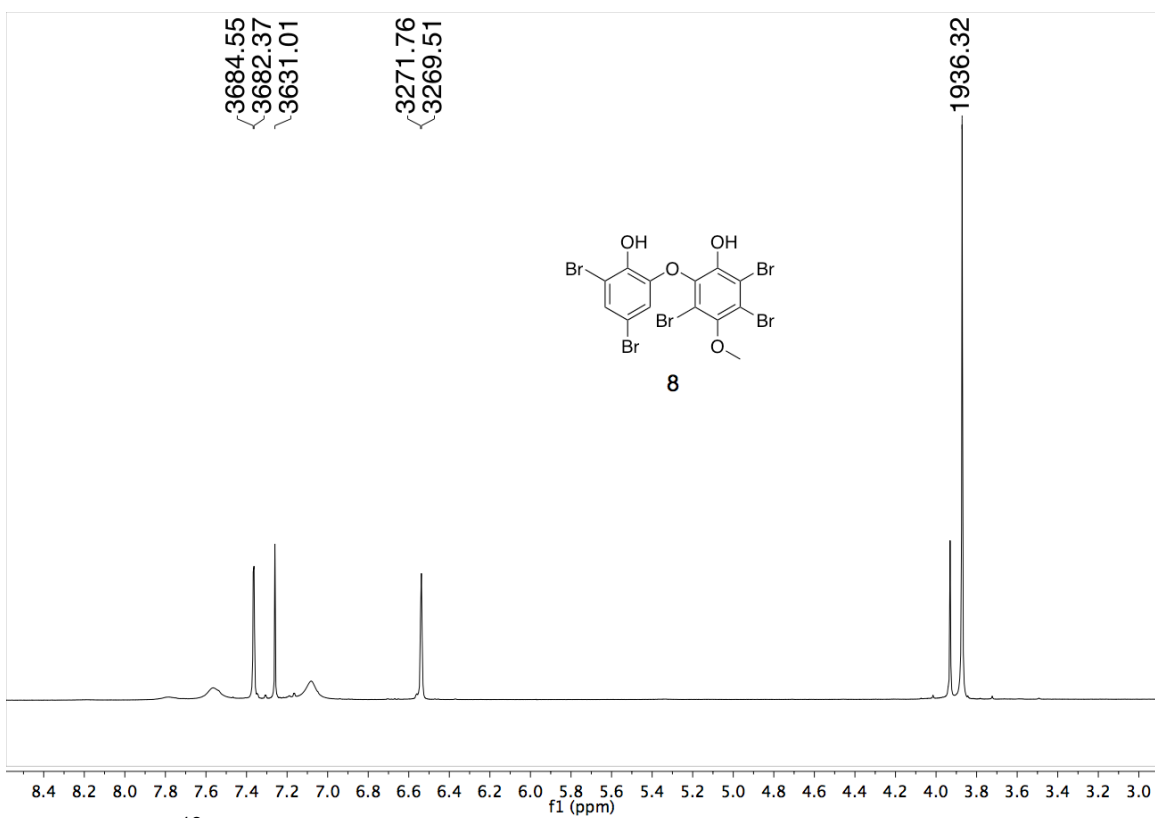

**Figure S2.**  $^{13}\text{C}$  NMR spectrum of **8** in  $\text{CDCl}_3$

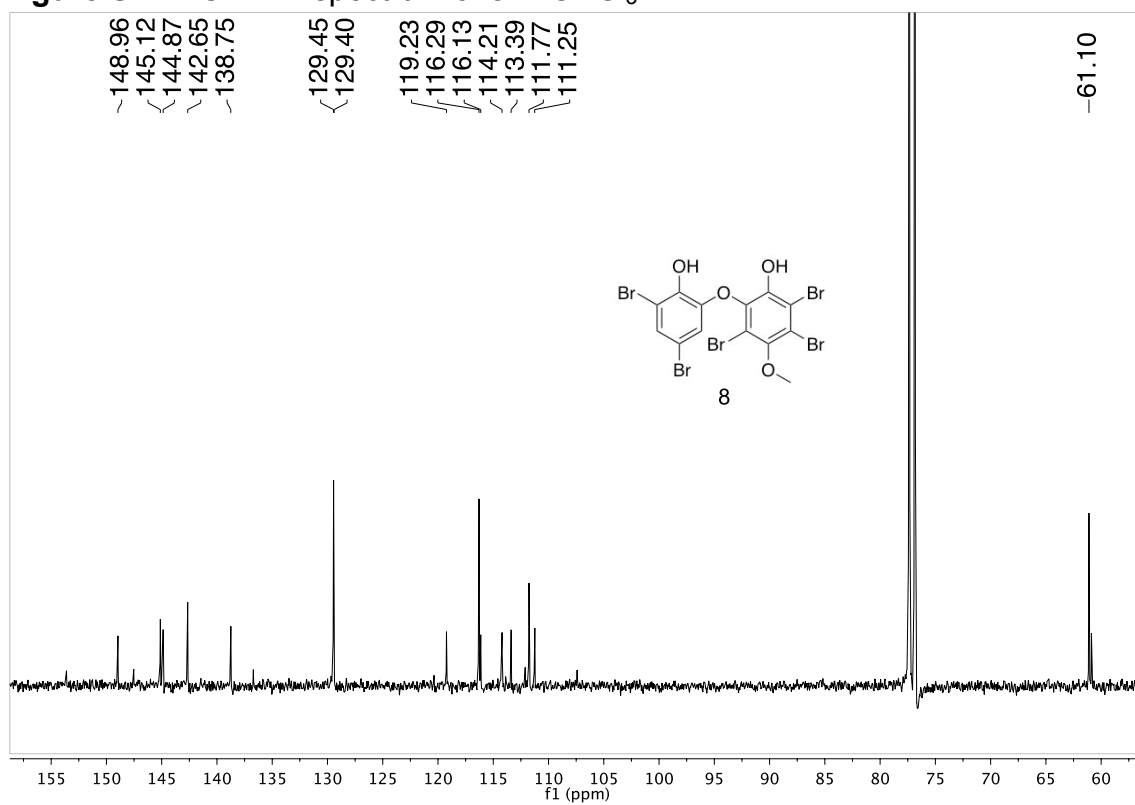

Figure S3. HSQC spectrum of **8** in CDCl<sub>3</sub>

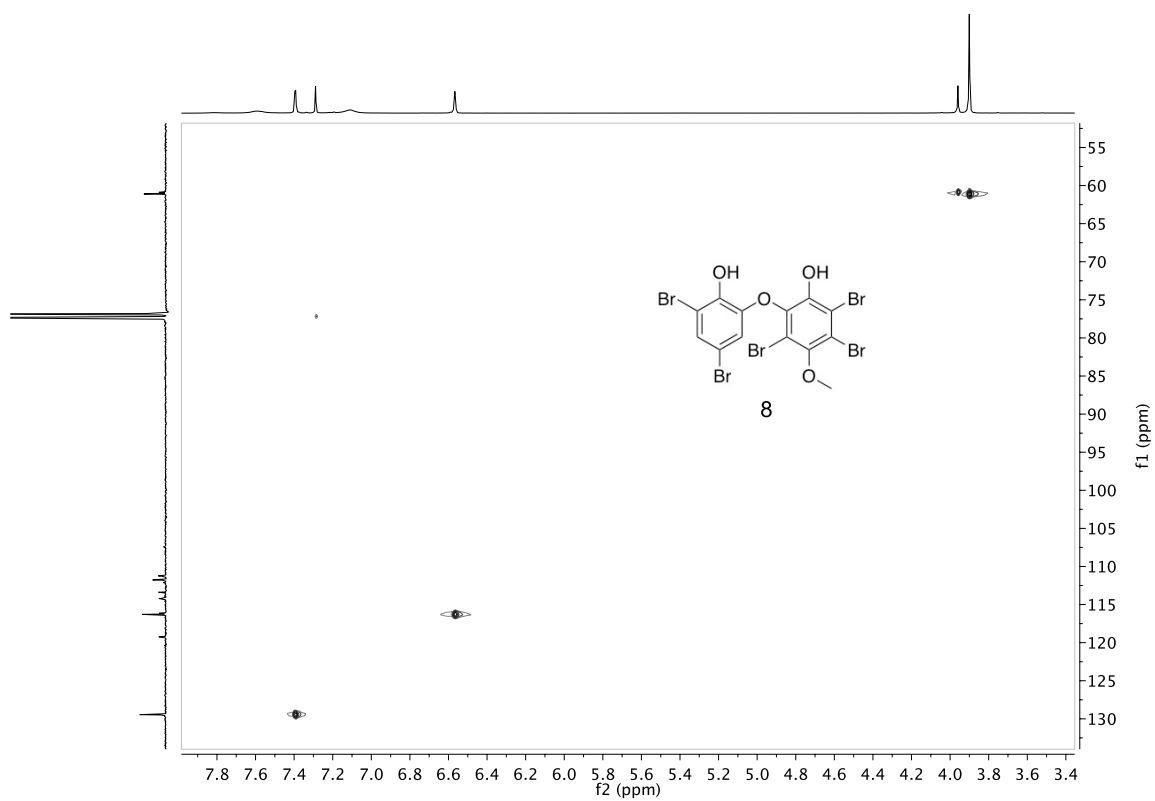

Figure S4. HMBC spectrum of **8** in CDCl<sub>3</sub>

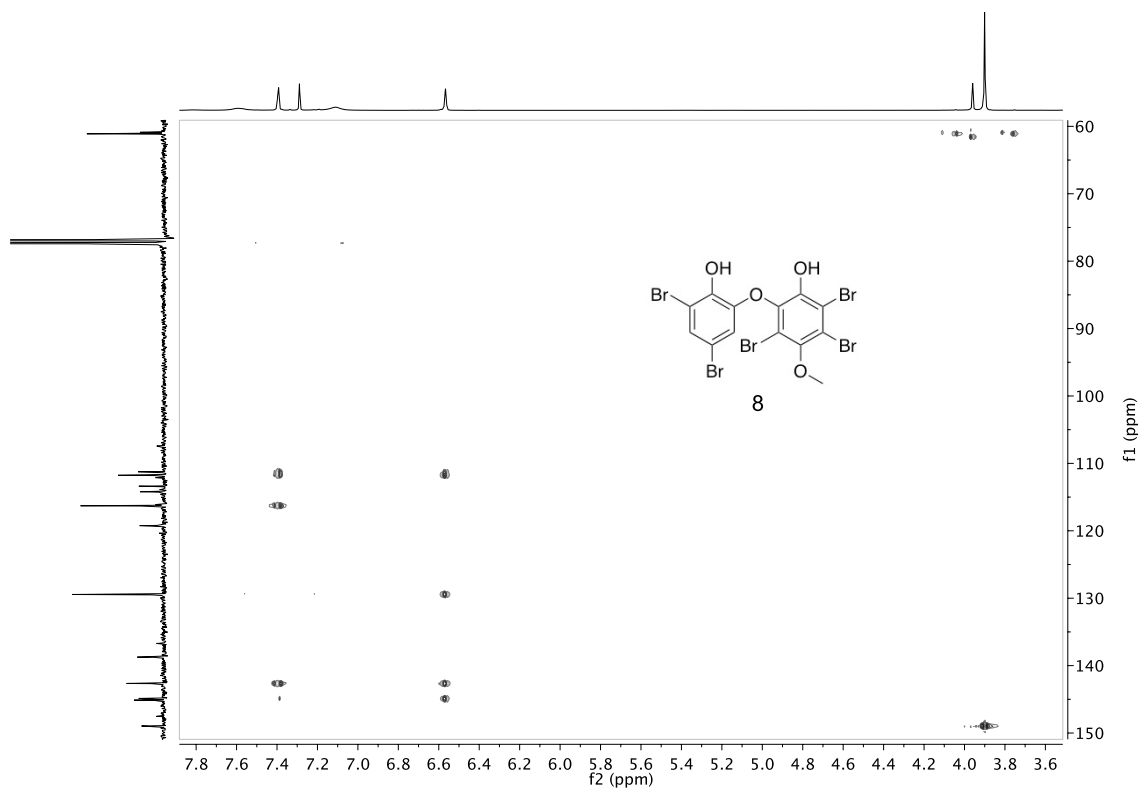

**Figure S5. IR spectrum of 8**

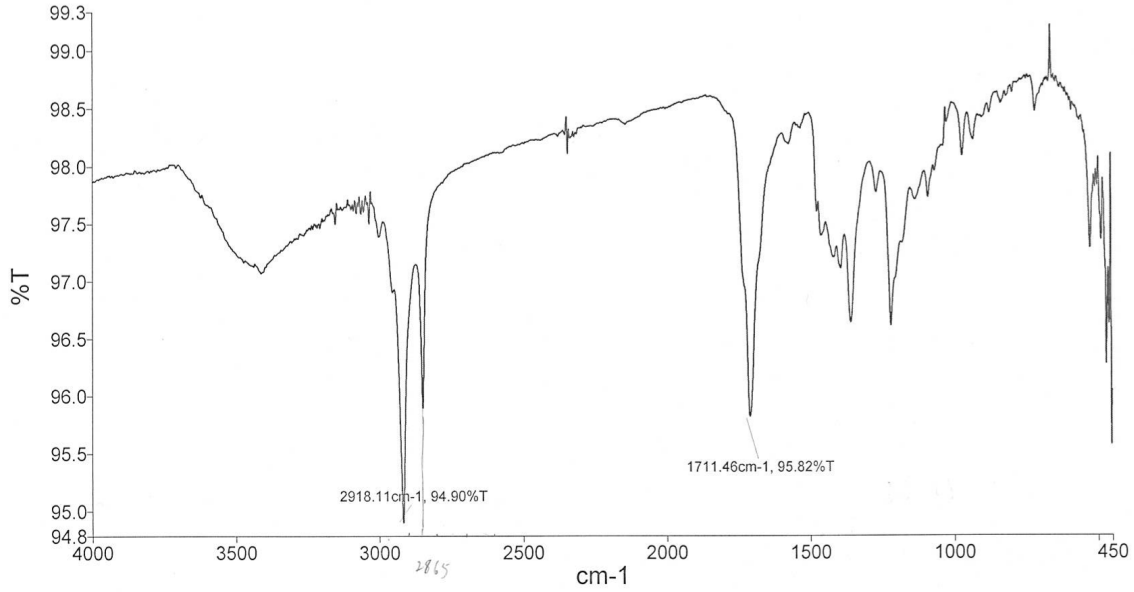

**Figure S6. HRESIMS spectrum of 8**

**Elemental Composition Report**

Page 1

**Single Mass Analysis**

Tolerance = 10.0 mDa / DBE: min = -2.0, max = 500.0  
 Element prediction: Off  
 Number of isotope peaks used for i-FIT = 3

Monoisotopic Mass, Even Electron Ions  
 29 formula(e) evaluated with 2 results within limits (up to 19 closest results for each mass)  
 Elements Used:  
 C: 0-120 H: 0-200 O: 0-50 79Br: 5-5  
 11-Feb-2015  
 hbl-11feb15-25-25-neg 79 (1.461) Cn (Cen,5, 50.00, Ar); Sm (SG, 3x5.00); Sb (12.5.00)

TOF MS ES-  
 1.76e+003

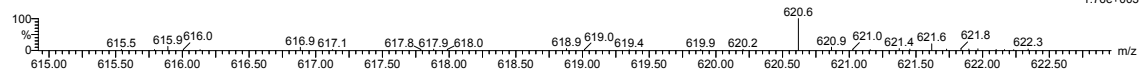

| Mass     | Calc. Mass | mDa  | PPM  | DBE  | i-FIT | Formula          |
|----------|------------|------|------|------|-------|------------------|
| 620.6187 | 620.6183   | 0.4  | 0.6  | 8.5  | n/a   | C13 H6 O4 79Br±5 |
|          | 620.6242   | -5.5 | -8.9 | -0.5 | n/a   | C6 H10 O9 79Br±5 |

Figure S9.  $^1\text{H}$  NMR spectrum of **8a** in  $\text{CDCl}_3$

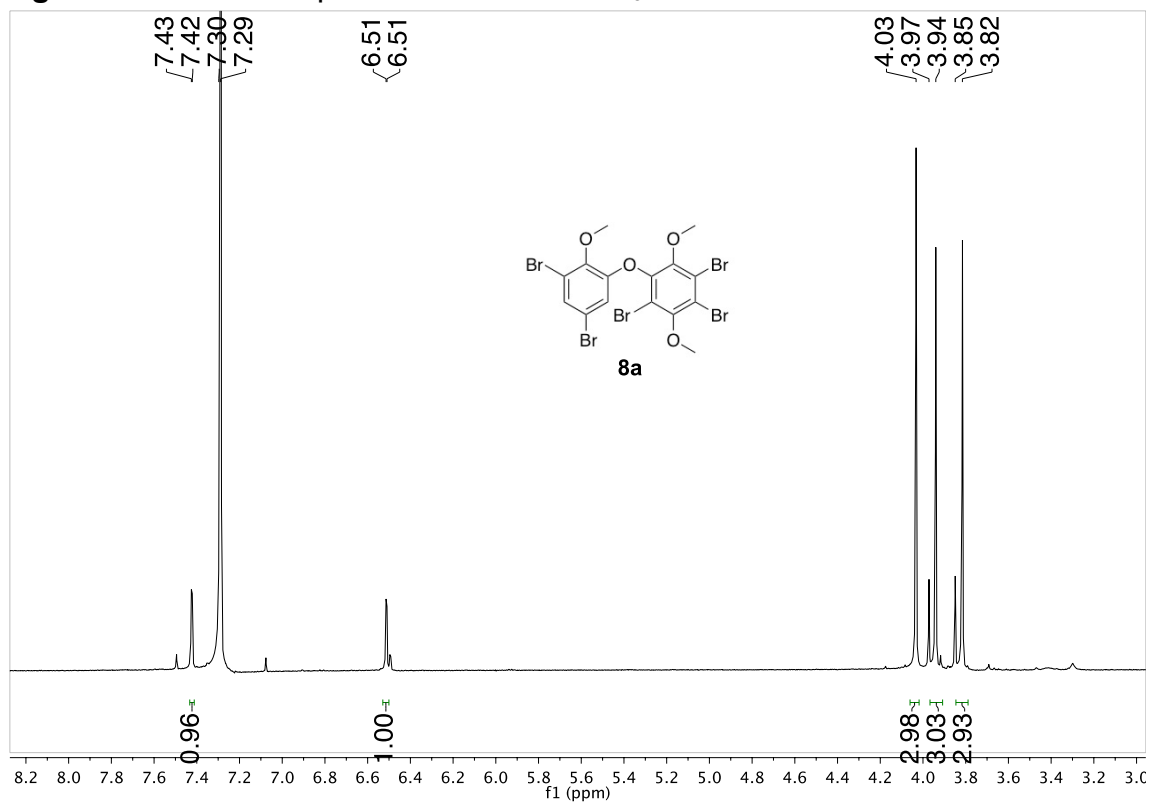

Figure S10.  $^{13}\text{C}$  NMR spectrum of **8a** in  $\text{CDCl}_3$

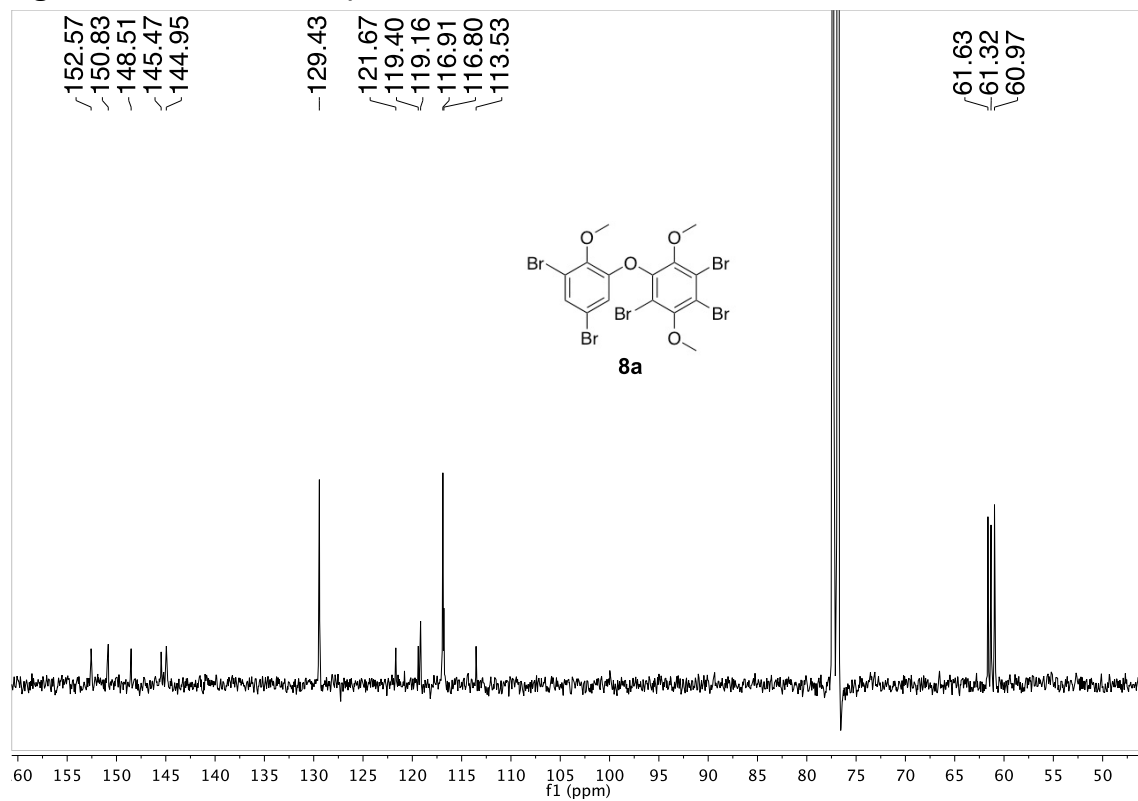

Figure S11. HSQC spectrum of **8a** in CDCl<sub>3</sub>

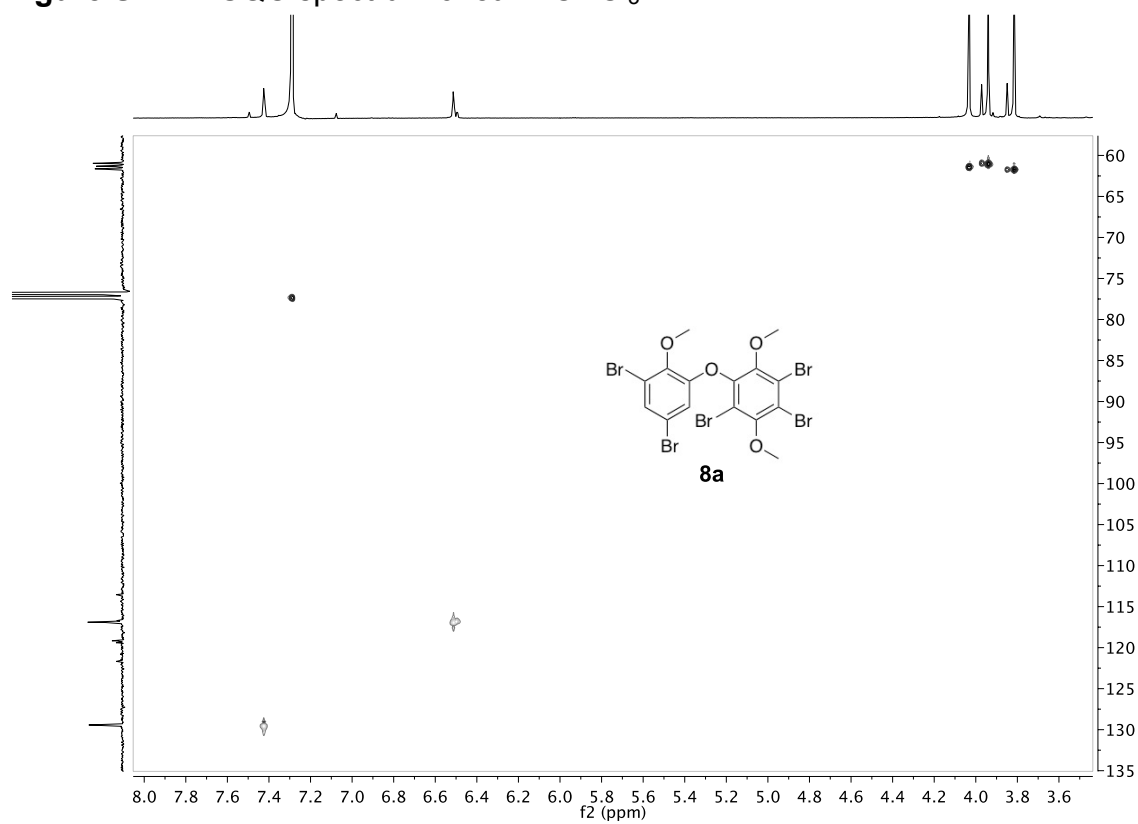

Figure S12. HMBC spectrum of **8a** in CDCl<sub>3</sub>

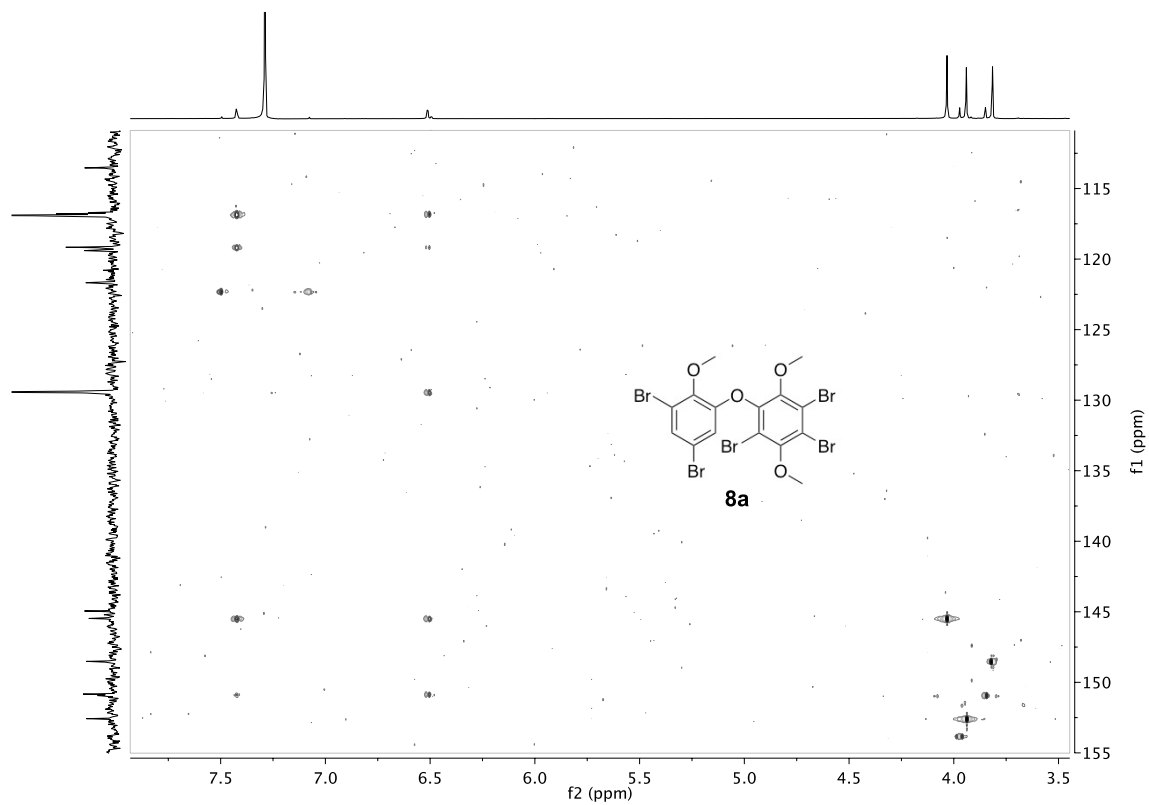



**Figure S13.** Selective 1-D NOE spectra of **8** and **8a**.

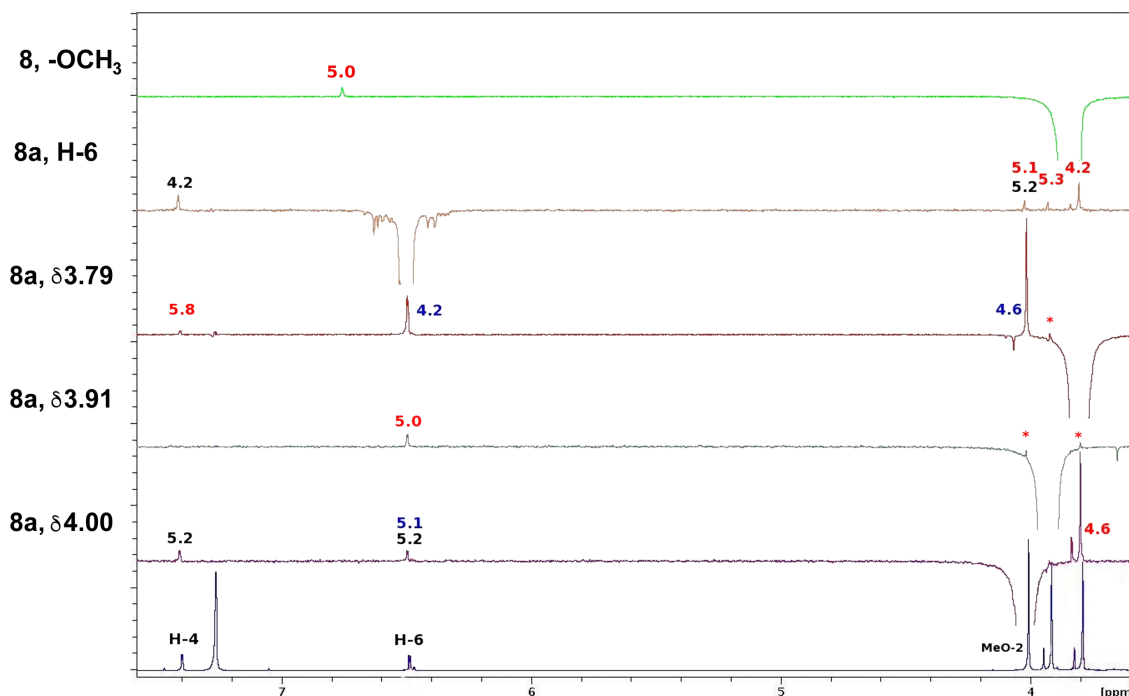

**Figure S7.** 1D-DPGSE-NOE spectra of **8** (top only) and **8a**. The bottom spectrum serves as a reference to which the NOE selected resonances have been similarly scaled. For clarity the spectra have been expanded to include selected resonances. Numbers in black are distances (Å) known from molecular geometry (methyl 5.2 Å =  $\langle 1/r^6 \rangle$ ); numbers in blue correspond to the complimentary NOE experiment; and those in red are calculated distances. The asterisks designate very weak NOE responses that correspond to  $>7$  Å. If comparing heights, the H-4 and H-6 responses should be approximately doubled to account for line width. The difference between known 5.2 and calculated 5.1 Å for the ring A methoxy to H-6 distance (second to top spectrum) is suggestive of the error in the calculations (less than 2%).

1D NOE analysis for ring B. To investigate the substitution pattern of hydroxy, the naturally occurring methoxy and bromine atoms in ring B, we recorded transient 1D-NOE spectra for **8** and **8a** wherein each proton was irradiated in individual spectra. NOE peak intensities were integrated and distances calculated as a function of  $\langle 1/r^6 \rangle$  by comparing to experimental intensities between atoms with known distances. Along with the molecular connectivity described in the paper the NOEs led to some specific conclusions. First, the NOE from the two B ring methoxy groups ( $\text{Me}^B$ ) suggested that they were separated by  $>6$  Å, which ruled out an ortho relationship to one another and, with the exception of the 1'5' configuration, conformers with the  $\text{Me}^B$ s on the same side of the plane of the aromatic ring. Further analysis indicated that the methoxy at  $\delta_{\text{H}}$  3.79 was close to both the C-2  $-\text{OCH}_3$

and H-6 (4.6 and 4.2 Å, respectively), and the other methoxy at  $\delta_{\text{H}}$  3.91 was  $\sim 6$  Å from C-2  $-\text{OCH}_3$  and 5 Å from H-6. This eliminated methoxy substitution at C-1'/C-3' (where both methoxy groups are always close to the methoxy and H-6 in ring A) and C-4'/C-6' (in which no conformer is close to both) but could not unambiguously distinguish between the C-1'/C-4' and C-1'/C-5' positions. This left either the 1'/4' or 1'/5' arrangement with the 1'-Me<sup>B</sup> positioned close to both Me<sup>A</sup> and H-6. For both of these, the ether bond rotational barrier (MM2 level) is  $\sim 12$  kcal/mol, thus rotating on the NMR timescale, and  $\sim 2$  kcal/mol advantage ( $>95\%$  of population) for the lowest energy conformer which has H-6 positioned over ring-B as opposed to C-2  $-\text{OCH}_3$ . This major conformer is consistent with the shielded shift of H-6, comparatively deshielded shift of Me<sup>A</sup>, with one Me<sup>B</sup> located close and one distant to Me<sup>A</sup>, and the H-6 contact with both Me<sup>B</sup>s. Considering this conformation, a 5'-Me<sup>B</sup> would be over 8 Å from Me<sup>A</sup> whereas a 4'-Me<sup>B</sup> would be roughly equidistant (6-7 Å) from Me<sup>A</sup> and 1'-Me<sup>B</sup>, which is consistent with the NOE data and the 4' shift change, vide infra. The similar NOE response from the methoxy at  $\delta_{\text{H}}$  3.91 in **8** compared to **8a** suggested that this was the original Me<sup>B</sup>. Finally, a shorter  $^{13}\text{C}-T_1$  relaxation time for the resonance at  $\delta_{\text{C}}$  119, the chemical shift itself, and the changes in chemical shift were consistent with the Br resonance assignments.

**Figure S14. IR spectrum of 8a**

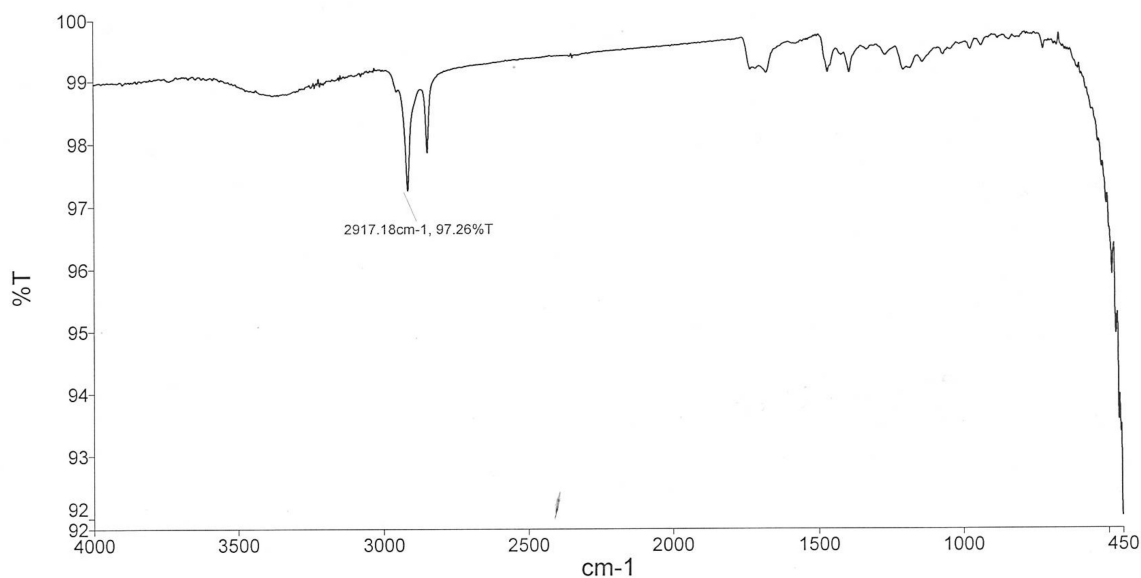

**Figure S15. HRESIMS spectrum of 8a**

**Elemental Composition Report**

Page 1

**Single Mass Analysis**

Tolerance = 10.0 mDa / DBE: min = -50.0, max = 500.0

Element prediction: Off

Number of isotope peaks used for i-FIT = 3

Monoisotopic Mass, Odd Electron Ions

131 formula(e) evaluated with 3 results within limits (up to 19 closest results for each mass)

Elements Used:

C: 0-100 H: 0-200 O: 0-30 79Br: 5-5

14-Apr-2015

hbl-14apr15-asap-25-25-dimethyl-pos 164 (2.813) Cn (Cen,5, 50.00, Ar); Sm (SG, 3x5.00); Sb (12.5.00)

TOF MS AP+

2.98e+004

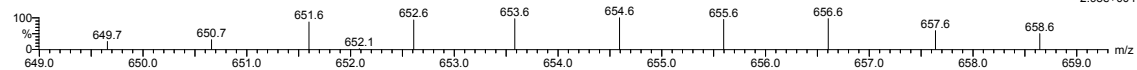

Minimum:

Maximum:

| Mass     | Calc. Mass | mDa  | PPM   | DBE  | i-FIT   | Formula          |
|----------|------------|------|-------|------|---------|------------------|
| 649.6567 | 649.6574   | -0.7 | -1.1  | 8.0  | 16675.3 | C15 H11 O4 79Br5 |
|          | 649.6633   | -6.6 | -10.2 | -1.0 | 17340.8 | C8 H15 O9 79Br5  |
|          | 649.6480   | 8.7  | 13.4  | -5.0 | 17327.2 | C4 H15 O12 79Br5 |

Figure S16.  $^1\text{H}$  NMR spectrum of **3a** in  $\text{CDCl}_3$

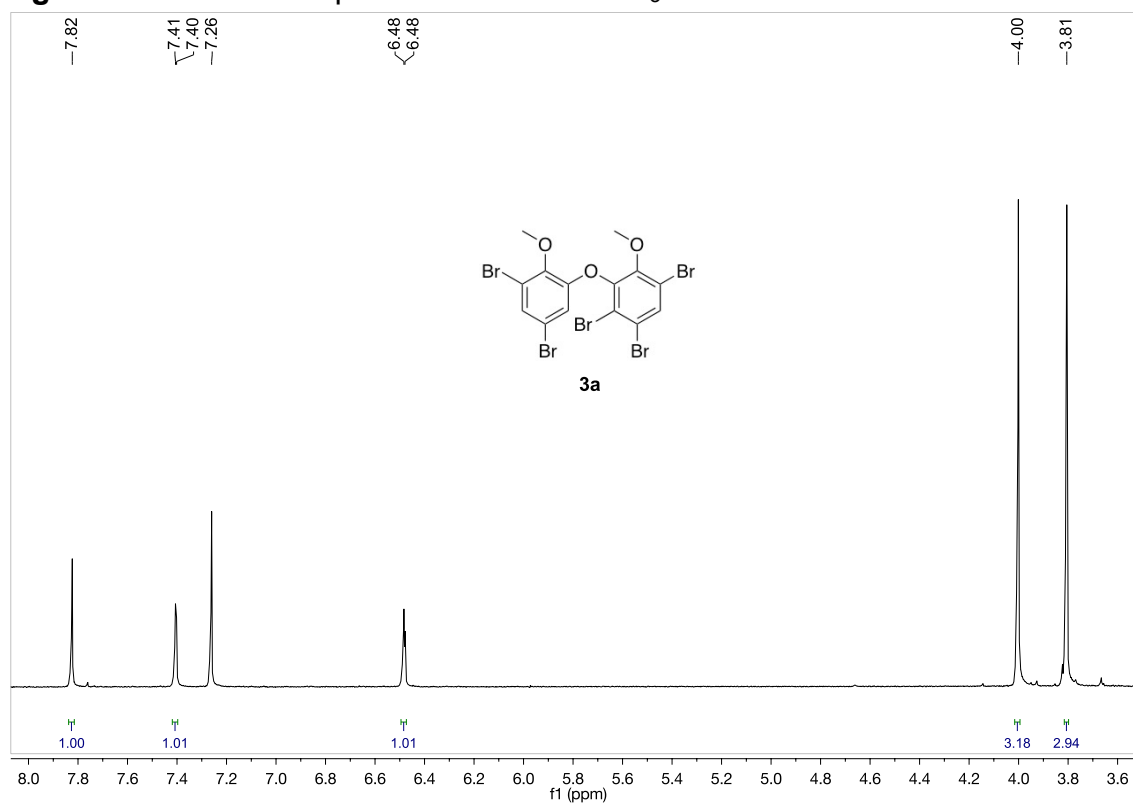

Figure S17.  $^{13}\text{C}$  NMR spectrum of **3a** in  $\text{CDCl}_3$

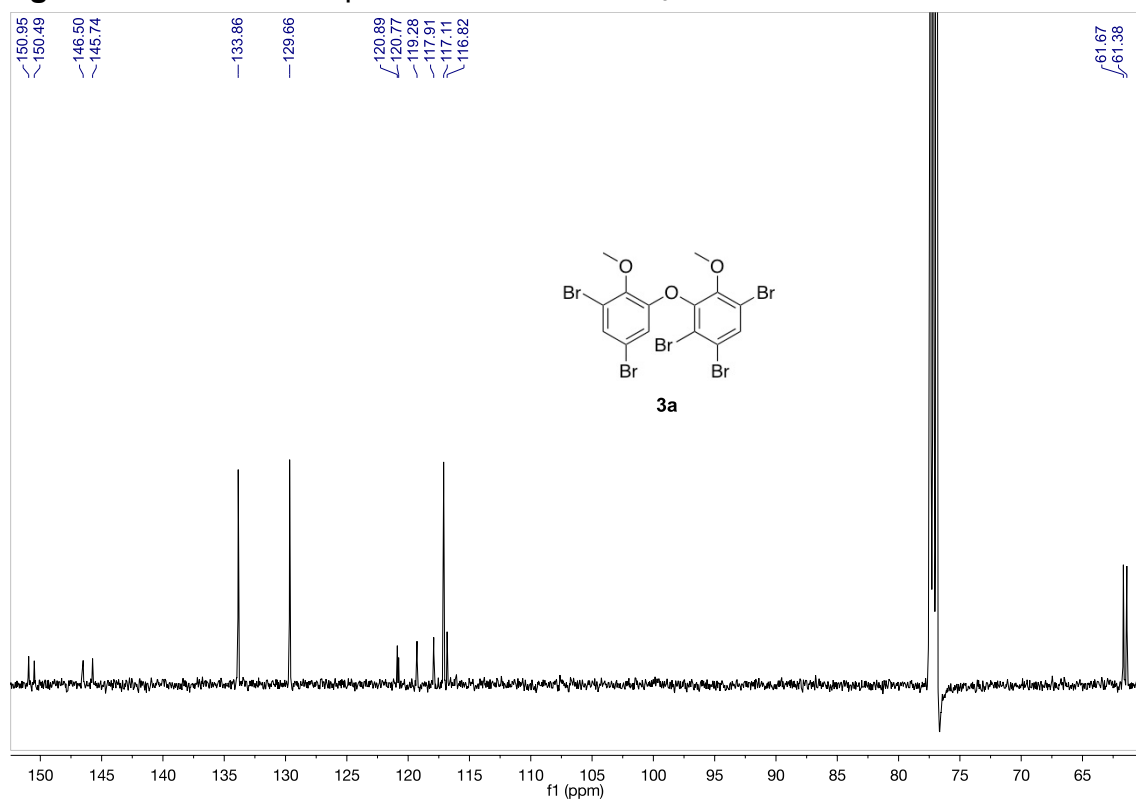

Figure S18. HSQC spectrum of **3a** in  $\text{CDCl}_3$

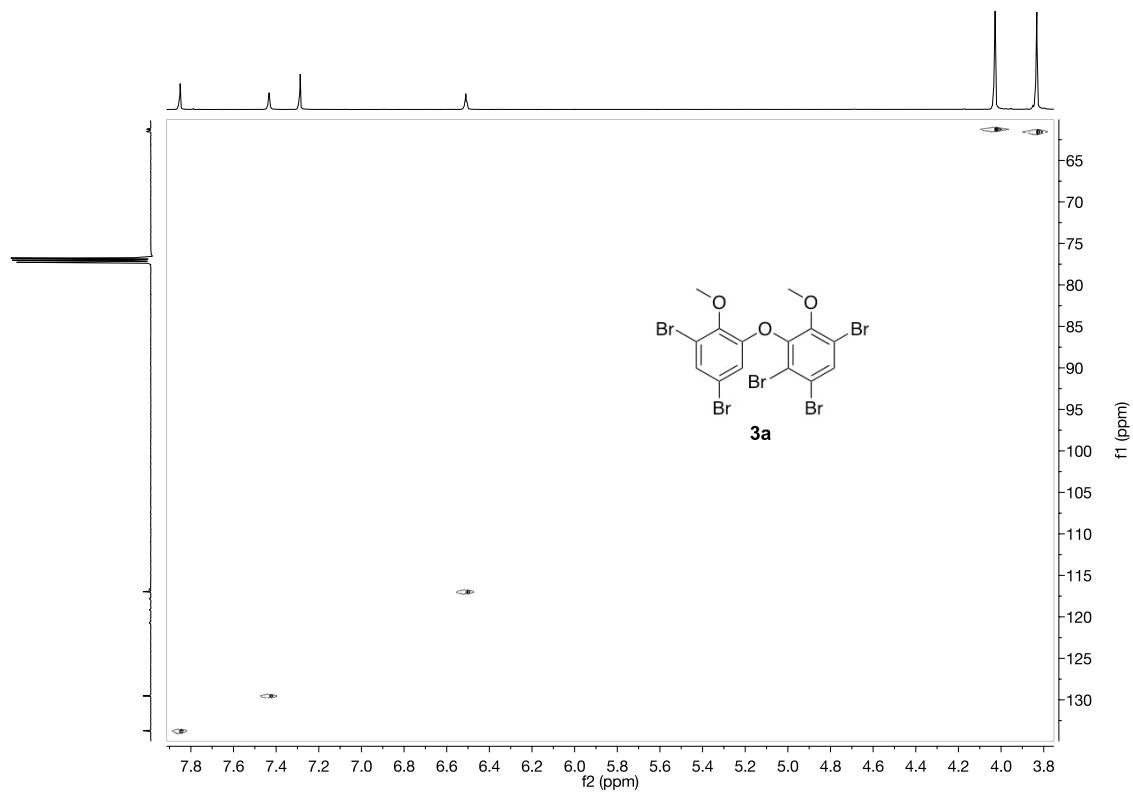

Figure S19. HMBC spectrum of **3a** in CDCl<sub>3</sub>

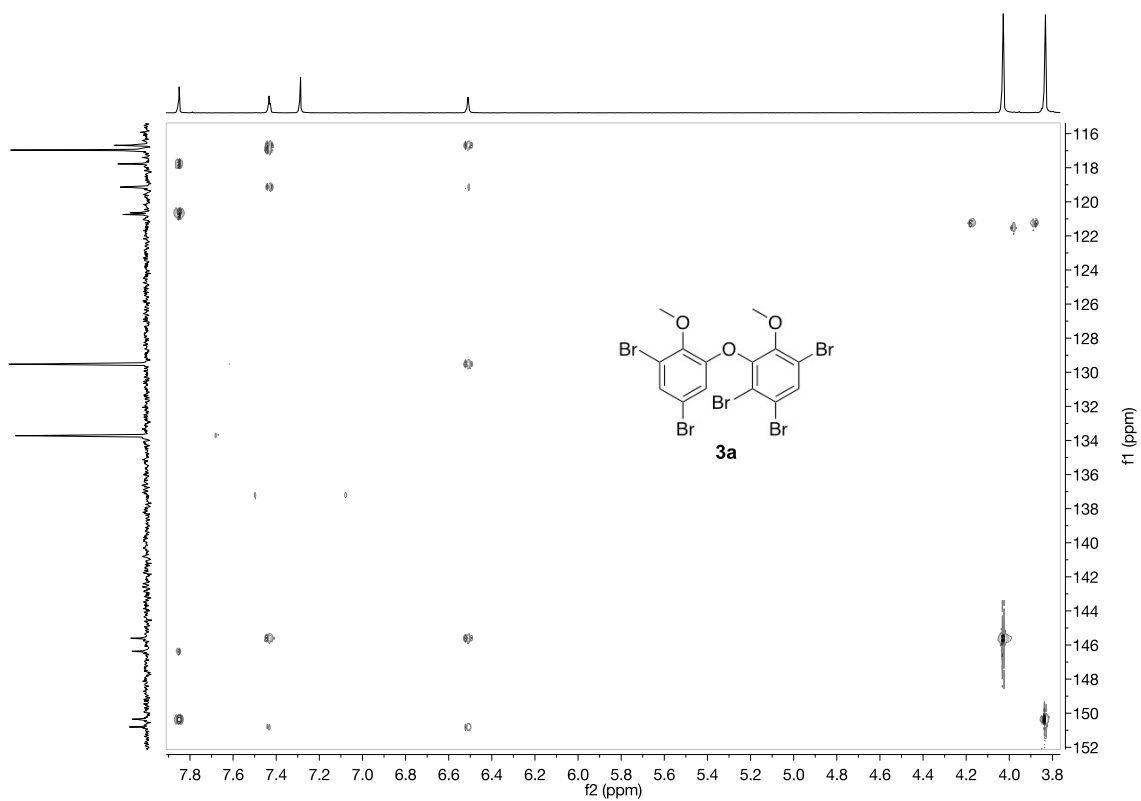

Figure S20. IR spectrum of **3a**

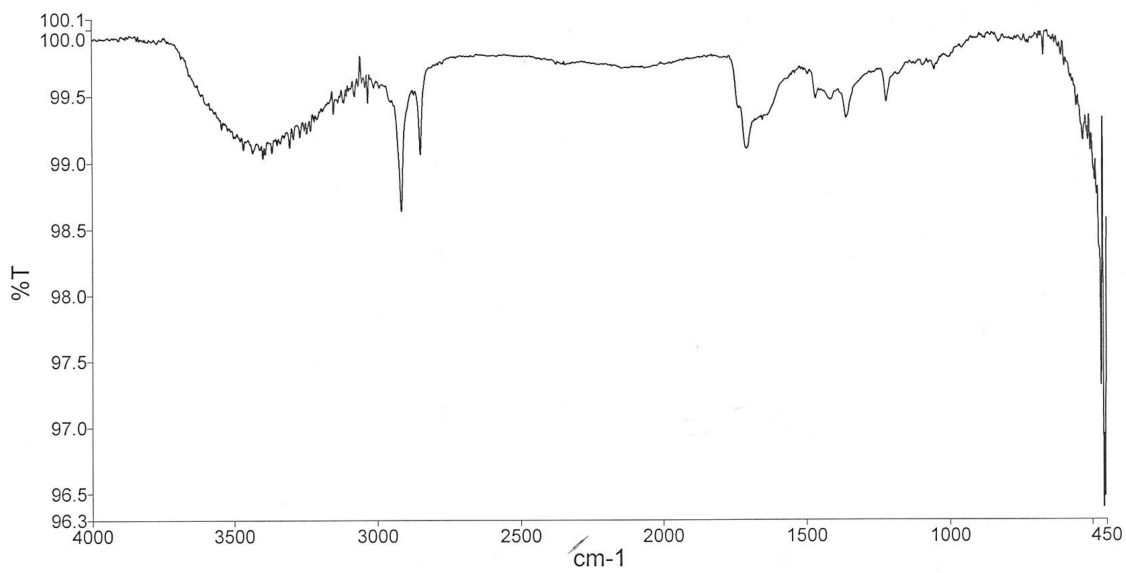

# Figure S21. HRESIMS spectrum of 3a

## Elemental Composition Report

Page 1

### Single Mass Analysis

Tolerance = 25.0 mDa / DBE: min = -50.0, max = 500.0

Element prediction: Off

Number of isotope peaks used for i-FIT = 3

Monoisotopic Mass, Odd Electron Ions

109 formula(e) evaluated with 8 results within limits (up to 19 closest results for each mass)

Elements Used:

C: 0-100 H: 0-200 O: 0-30 79Br: 5-5

15-Apr-2015

hbl-15apr15-asap-25-27-methylated 75 (1.287) Cn (Cen,5, 50.00, Ar); Sm (SG, 3x5.00); Sb (12.5.00)

TOF MS AP+  
1.17e+004

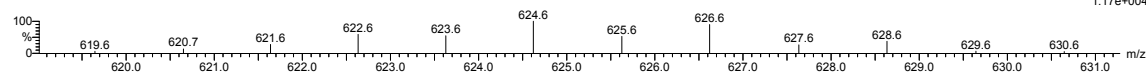

Minimum:

Maximum: 25.0 10.0 -50.0  
500.0

| Mass     | Calc. Mass | mDa   | PPM   | DBE   | i-FIT  | Formula          |
|----------|------------|-------|-------|-------|--------|------------------|
| 619.6458 | 619.6468   | -1.0  | -1.6  | 8.0   | 2282.2 | C14 H9 O3 79Br5  |
|          | 619.6527   | -6.9  | -11.1 | -1.0  | 2341.6 | C7 H13 O8 79Br5  |
|          | 619.6375   | 8.3   | 13.4  | -5.0  | 2363.4 | C3 H13 O11 79Br5 |
|          | 619.6586   | -12.8 | -20.7 | -10.0 | 2399.2 | H17 O13 79Br5    |
|          | 619.6316   | 14.2  | 22.9  | 4.0   | 2313.4 | C10 H9 O6 79Br5  |
|          | 619.6621   | -16.3 | -26.3 | 12.0  | 2269.1 | C18 H9 79Br5     |
|          | 619.6257   | 20.1  | 32.4  | 13.0  | 2260.3 | C17 H5 O 79Br5   |
|          | 619.6680   | -22.2 | -35.8 | 3.0   | 2337.5 | C11 H13 O5 79Br5 |

# Figure S22. <sup>1</sup>H NMR spectrum of 5a in CDCl<sub>3</sub>

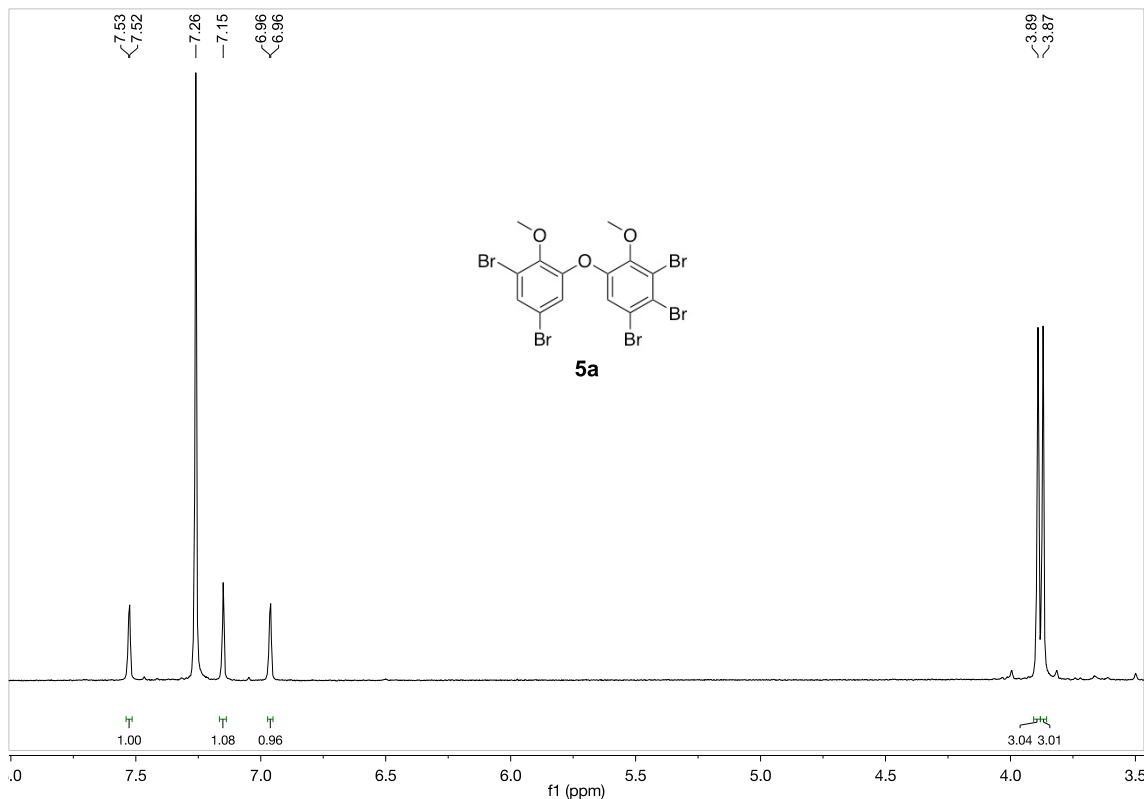

Figure S23.  $^{13}\text{C}$  NMR spectrum of **5a** in  $\text{CDCl}_3$

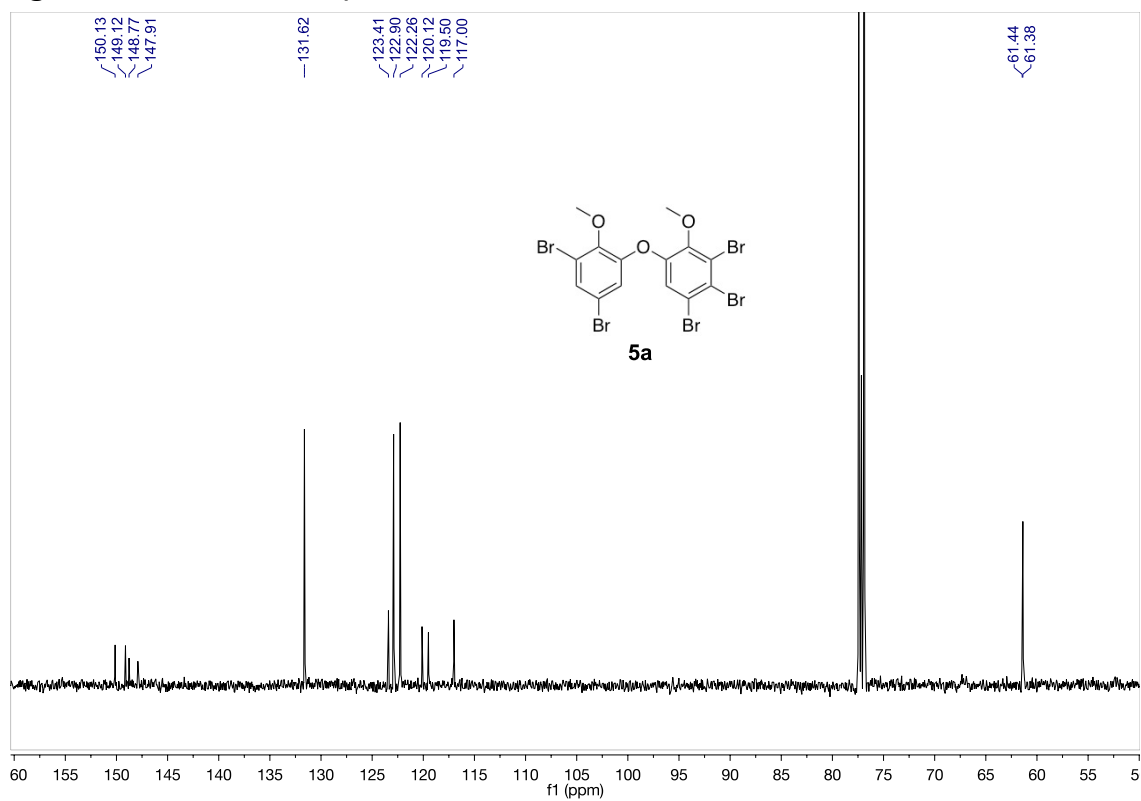

Figure S24. HSQC spectrum of **5a** in  $\text{CDCl}_3$

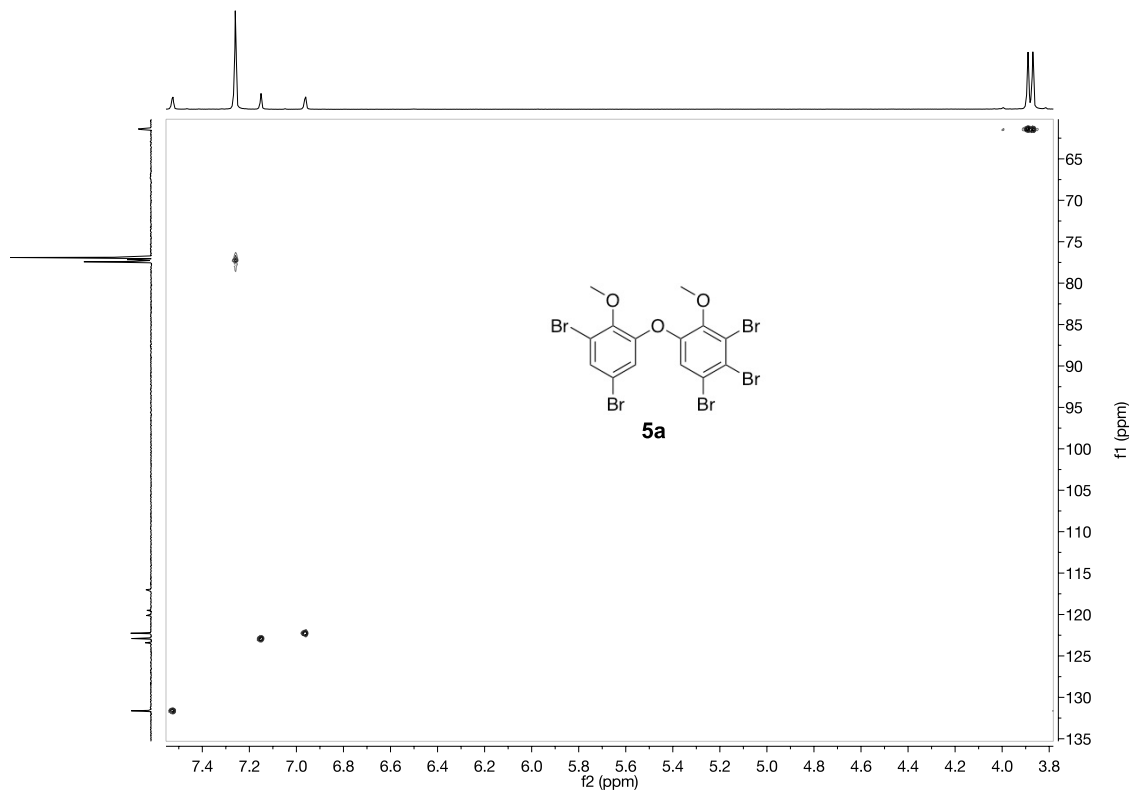



Figure S25. HMBC spectrum of **5a** in CDCl<sub>3</sub>

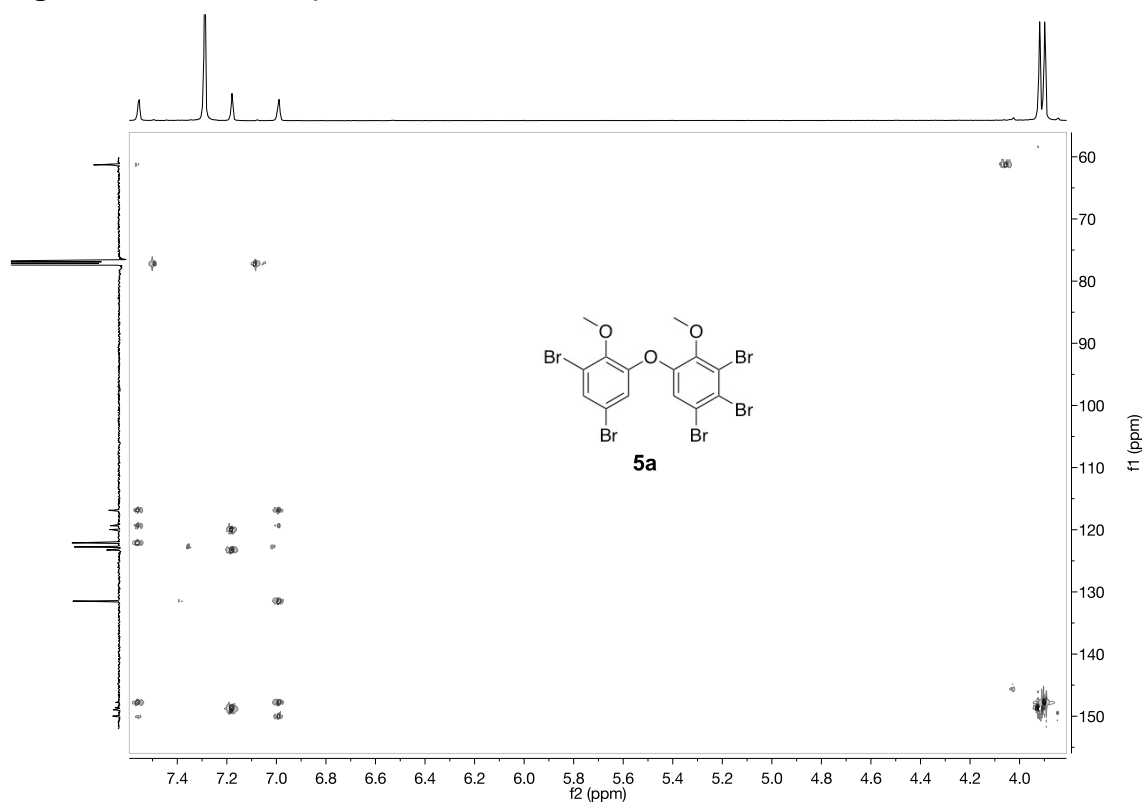

Figure S26. IR spectrum of **5a**

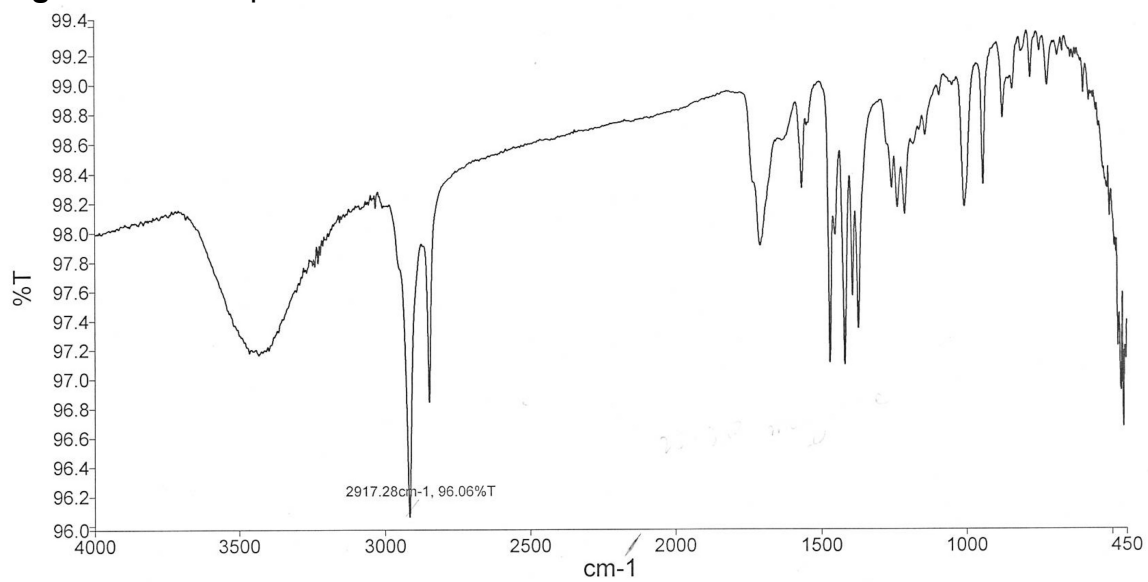

# Figure S27. HRESIMS spectrum of 5a

## Elemental Composition Report

Page 1

### Single Mass Analysis

Tolerance = 25.0 mDa / DBE: min = -50.0, max = 500.0

Element prediction: Off

Number of isotope peaks used for i-FIT = 3

Monoisotopic Mass, Odd Electron Ions

109 formula(e) evaluated with 8 results within limits (up to 19 closest results for each mass)

Elements Used:

C: 0-100 H: 0-200 O: 0-30 79Br: 5-5

15-Apr-2015

hbl-15apr15-asap-25-30-metylated 112 (1.921) Cn (Cen,5, 50.00, Ar); Sm (SG, 3x5.00); Sb (12.5.00)

TOF MS AP+  
1.78e+004

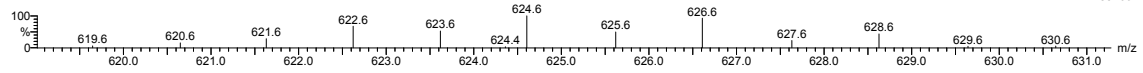

Minimum: -50.0  
Maximum: 500.0

| Mass     | Calc. Mass | mDa   | PPM   | DBE   | i-FIT  | Formula          |
|----------|------------|-------|-------|-------|--------|------------------|
| 619.6473 | 619.6468   | 0.5   | 0.8   | 8.0   | 3661.1 | C14 H9 O3 79Br5  |
| 619.6527 | 619.6527   | -5.4  | -8.7  | -1.0  | 3748.4 | C7 H13 O8 79Br5  |
| 619.6375 | 619.6375   | 9.8   | 15.8  | -5.0  | 3767.9 | C3 H13 O11 79Br5 |
| 619.6586 | 619.6586   | -11.3 | -18.2 | -10.0 | 3833.7 | H17 O13 79Br5    |
| 619.6621 | 619.6621   | -14.8 | -23.9 | 12.0  | 3655.6 | C18 H9 79Br5     |
| 619.6316 | 619.6316   | 15.7  | 25.3  | 4.0   | 3694.9 | C10 H9 O6 79Br5  |
| 619.6680 | 619.6680   | -20.7 | -33.4 | 3.0   | 3756.7 | C11 H13 O5 79Br5 |
| 619.6257 | 619.6257   | 21.6  | 34.9  | 13.0  | 3617.6 | C17 H5 O 79Br5   |

### **Bacterial strains and Minimal Inhibitory Concentration determination**

Compounds were tested in duplicate in at least two independent experiments for their antimicrobial activity against laboratory strains listed in Table 3 and as described in the Clinical and Laboratory Standards Institute (CLSI) guidelines. Laboratory strains were obtained from the American Type Culture Collection (ATCC).

### **Cytotoxicity assays**

The effects of compounds **1** and **2** on HCT-116 (human colorectal cancer cell line) and BSC-1 (monkey kidney cell line) cells were determined using an MTT cell proliferation assay kit (American Type Culture Collection, Manassas, VA). HCT-116 ( $1 \times 10^4$  cells/well) or BSC-1 ( $2 \times 10^4$  cells/well) cells were seeded in 96-well tissue culture plates and allowed to adhere for 18 h. Cells were then exposed for 24 hr to two-fold dilutions of compounds where concentrations ranged from 0.4 to 100  $\mu\text{g/ml}$ , followed by addition of fresh growth media. After 48 h of additional incubation, the media was replaced with 10% MTT and plates were incubated for 4 hr. Cells were lysed with detergent (100  $\mu\text{l}$ ) and plates were stored in the dark at room temperature for 2 hr.  $A_{570}$  values were read using a multi-mode microplate reader (Synergy HT, Biotek Instruments, Inc.).
